# Supplementary material for: The two-step mechanochemical synthesis of porphyrins
Source: Royal Society of Chemistry journal article supplement (doi:10.1039/c3fd00140g), 2014-01-01
Supplement: c3fd00140g.pdf [file c3fd00140g.pdf]

## Electronic Supplementary Information for FD 170 Two-step Mechanochemical Synthesis of Porphyrins

Hannah Shy,<sup>a</sup> Paula Mackin,<sup>a</sup> Andrea S. Orvieto,<sup>a</sup> Deepa Gharbharan,<sup>a</sup> Geneva R. Peterson,<sup>b</sup> Nick Bampos<sup>b</sup> and Tamara D. Hamilton<sup>a\*</sup>

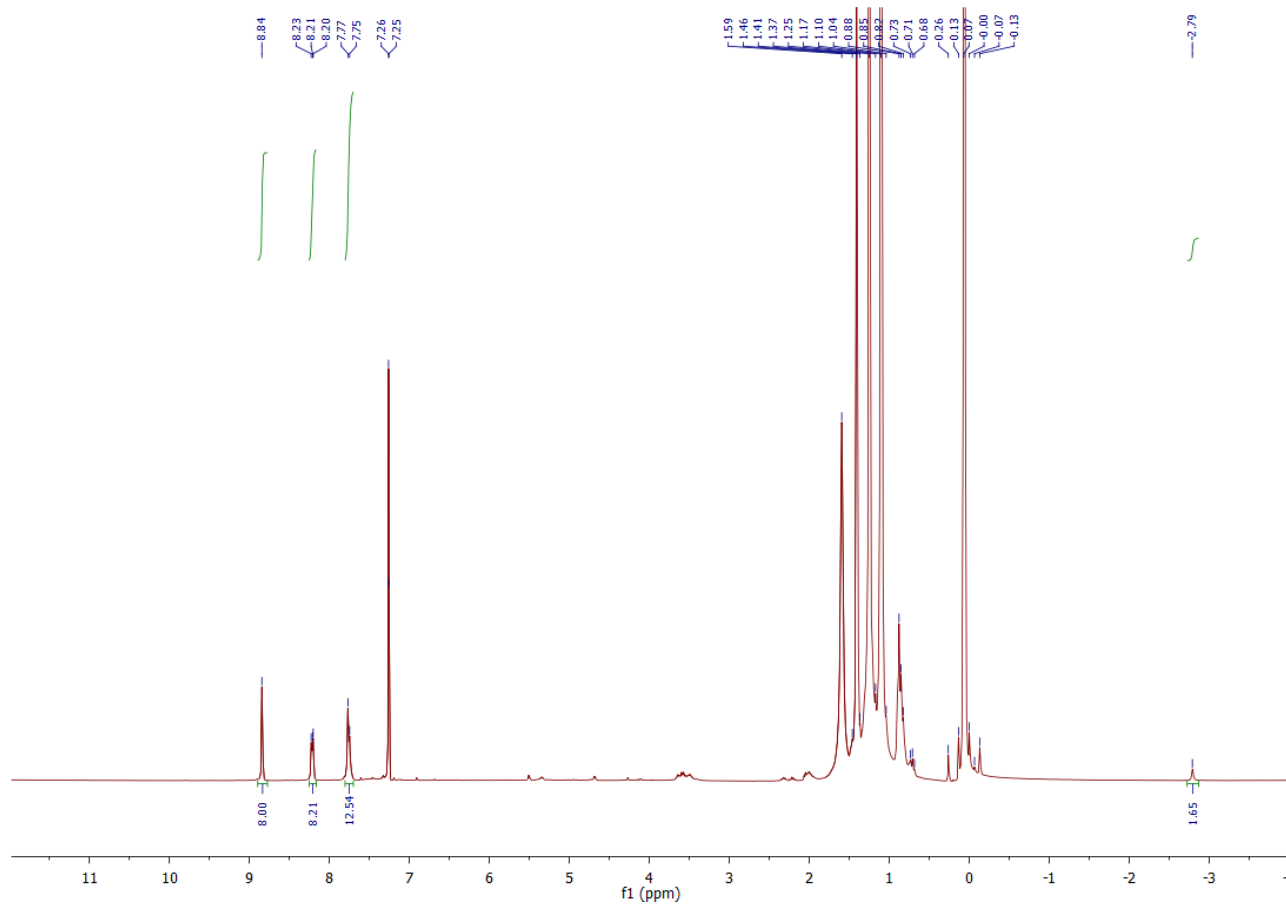

**Figure S1.** <sup>1</sup>H NMR spectrum of TPP produced by mechanochemical condensation followed by oxidation in solution.

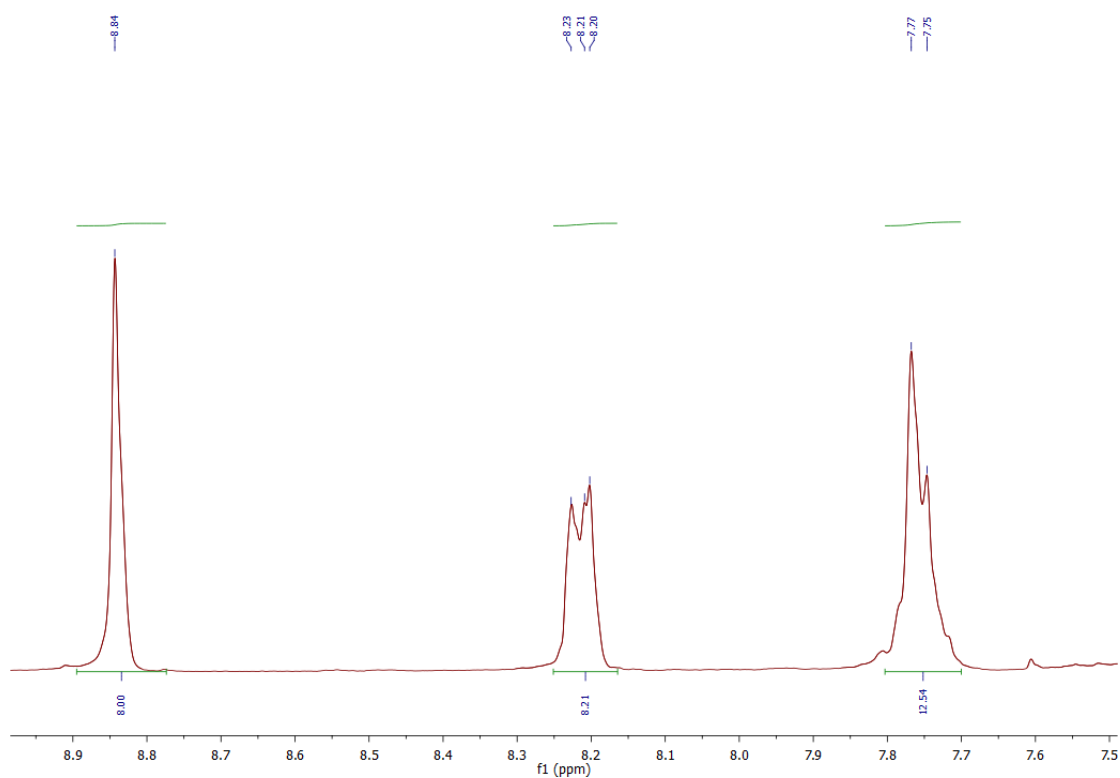

**Figure S2.** Expansion of the region from 9-7.5 ppm from Figure S1.

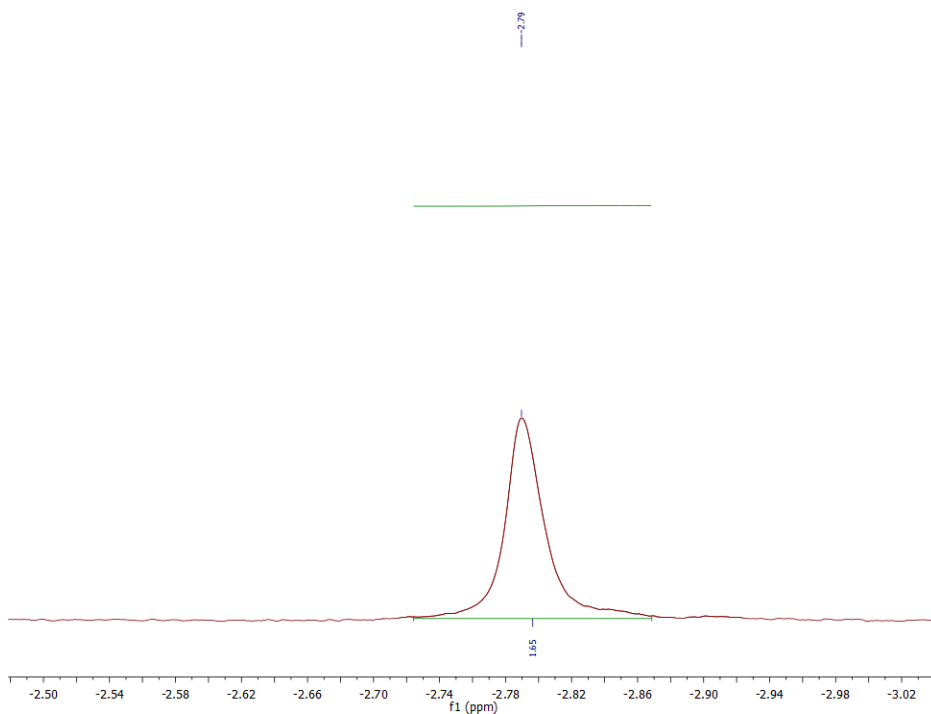

**Figure S3.** Expansion of the region from -2.5 to -3 ppm from Figure S1

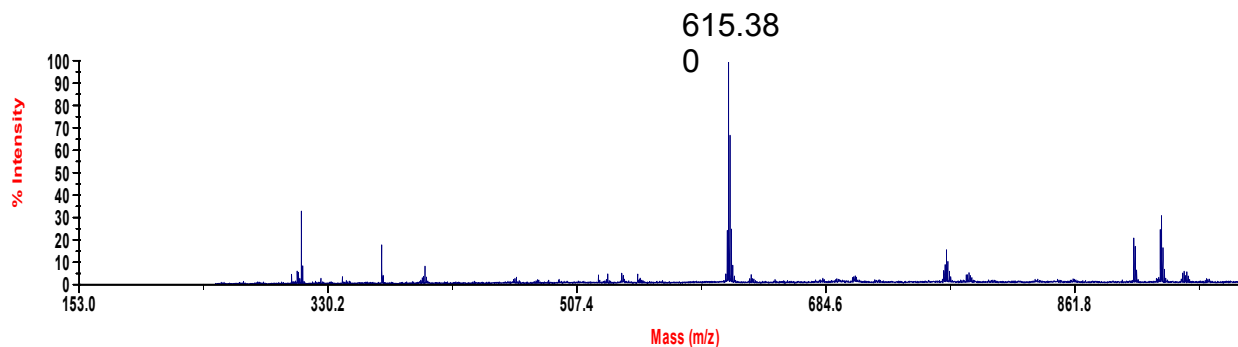

**Figure S4.** MALDI-TOF Mass spectrum of TPP

**Table S1.** EcoScale penalty points for Lindsey synthesis of TPP

| Category                     | Penalty Points |
|------------------------------|----------------|
| Yield                        | 35             |
| Price of reaction components | 37             |
| Safety                       | 60             |
| Technical setup              | 1              |
| Temperature/ time            | 3              |
| Workup and purification      | 10             |
| Total                        | 146            |
| EcoScale (100-Total)         | -46            |

**Table S2.** EcoScale penalty points for mechanochemical condensation followed by oxidation in solution

| Category                     | Penalty Points |
|------------------------------|----------------|
| Yield                        | 37.5           |
| Price of reaction components | 32             |
| Safety                       | 50             |
| Technical setup              | 1              |
| Temperature/ time            | 3              |
| Workup and purification      | 10             |
| Total                        | 133.5          |
| EcoScale (100-Total)         | -33.5          |

**Table S3.** EcoScale penalty points for two-step mechanochemical synthesis

| <b>Category</b>              | <b>Penalty Points</b> |
|------------------------------|-----------------------|
| Yield                        | 45.36                 |
| Price of reaction components | 15                    |
| Safety                       | 30                    |
| Technical setup              | 0                     |
| Temperature/ time            | 0                     |
| Workup and purification      | 3                     |
| Total                        | 93.36                 |
| EcoScale (100 – Total)       | 6.64                  |
